1 **Bats are key hosts in the radiation of mammal-associated *Bartonella***  
2 **bacteria**

3

4 Clifton D. McKee<sup>a,b,c,1</sup>, Ying Bai<sup>d</sup>, Colleen T. Webb<sup>a,b</sup>, Michael Y. Kosoy<sup>e</sup>

5

6 <sup>a</sup>Graduate Degree Program in Ecology, Colorado State University, 1021 Campus Delivery, Fort Collins,  
7 CO 80523, USA

8 <sup>b</sup>Department of Biology, Colorado State University, 1878 Campus Delivery, Fort Collins, CO 80523,  
9 USA

10 <sup>c</sup>Department of Epidemiology, Johns Hopkins Bloomberg School of Public Health, 615 North Wolfe  
11 Street, Baltimore, MD 21205, USA

12 <sup>d</sup>Bacterial Diseases Branch, Division of Vector-Borne Diseases, Centers for Disease Control and  
13 Prevention, 3156 Rampart Road, Fort Collins, CO 80521, USA

14 <sup>e</sup>KB One Health, LLC, 3244 Reedgrass Court, Fort Collins, CO 80521, USA

15

16 <sup>1</sup>To whom correspondence should be addressed. Email: [clifton.mckee@gmail.com](mailto:clifton.mckee@gmail.com).

17

18 **Keywords:** Chiroptera, *Bartonella*, host associations, parasite dispersal, vector-borne infection,  
19 molecular phylogeny, molecular clock

20

## 21 **Abstract**

22           Bats are notorious reservoirs of several zoonotic diseases and may be uniquely tolerant of  
23 infection among mammals. Broad sampling has revealed the importance of bats in the diversification  
24 and spread of viruses and eukaryotes to other animal hosts. Vector-borne bacteria of the genus  
25 *Bartonella* are prevalent and diverse in mammals globally and recent surveys have revealed numerous  
26 *Bartonella* lineages in bats. We assembled a sequence database of *Bartonella* strains, consisting of nine  
27 genetic loci from 209 previously characterized lineages and 121 new cultured strains from bats, and  
28 used these data to perform the most comprehensive phylogenetic analysis of *Bartonella* to date. This  
29 analysis included estimation of divergence dates using a molecular clock and ancestral reconstruction  
30 of host associations and geography. We estimate that *Bartonella* began infecting mammals 62 million  
31 years ago near the Cretaceous-Paleogene boundary. Additionally, the radiation of particular *Bartonella*  
32 clades correlate strongly to the timing of diversification and biogeography of mammalian hosts. Bats  
33 were inferred to be the ancestral hosts of all mammal-associated *Bartonella* and appear to be  
34 responsible for the early geographic expansion of the genus. We conclude that bats have had a deep  
35 influence on the evolutionary radiation of *Bartonella* bacteria and their spread to other mammalian  
36 orders. These results support a ‘bat seeding’ hypothesis that could explain similar evolutionary patterns  
37 in other mammalian parasite taxa. Application of such phylogenetic tools as we have used to other taxa  
38 may reveal the general importance of bats in the ancient diversification of mammalian parasites.

### 39 **Significance statement**

40 Discovering the evolutionary history of infectious agents in animals is important for  
41 understanding the process of host adaptation and the origins of human diseases. To clarify the evolution  
42 of the *Bartonella* genus, which contains important human pathogens, we performed phylogenetic  
43 analysis on a broad diversity of *Bartonella* strains, including novel strains from bats. Our results  
44 indicate that *Bartonella* clades diversified along with their mammal hosts over millions of years. Bats  
45 appear to be especially important in the early radiation and geographic dispersal of *Bartonella* lineages.  
46 These patterns are consistent with research indicating a chiropteran origin of important human viruses  
47 and eukaryotic parasites, suggesting that bats may play a unique role as historical sources of infections  
48 to other hosts.

49

### 50 **Introduction**

51 A central part of the work done by disease ecologists is to understand the host range of  
52 infectious agents. However, host ranges must be understood in a coevolutionary context, specifically  
53 how agents have adapted to and diversified in hosts over time. Only by considering both ecological and  
54 evolutionary context can we understand how agents come to infect and adapt to new hosts. While  
55 cophylogeny is a common tool for studying the codiversification of hosts and parasites, few studies  
56 have examined the relative timing of the diversification of parasite lineages in parallel with that of  
57 hosts (1, 2).

58 The genus *Bartonella* is an excellent study system for disease ecology and evolution because it  
59 is common and diverse in many mammalian hosts (3). These alphaproteobacteria are facultative  
60 intracellular pathogens that can cause persistent, hemotropic infections in their hosts. Transmission  
61 between hosts occurs through a variety of hematophagous arthropod vectors, wherein bartonellae  
62 colonize the midgut and are then shed in arthropod feces (4). Clades of *Bartonella* species tend to be

63 host-specific (5), so it could be hypothesized that the genus diversified along with its mammalian hosts  
64 millions of years ago. However, there have been few comprehensive phylogenies of this genus and  
65 limited research on the influence of particular host groups on *Bartonella* evolution.

66 Bats are a group of special interest because they have traits that are amenable to parasite  
67 transmission, including their global distribution, ability to fly, seasonal migration, dense aggregations  
68 and high sociality in some species, long life spans, and the use of torpor and hibernation (6). There is  
69 also evidence that chiropteran immune systems are highly tolerant of infections, especially of viruses  
70 (7). Thus, their role as reservoirs for *Bartonella* bacteria may be uniquely influential among mammals.  
71 Bats are also an ancient clade of mammals (8), providing ample time for diversification of bacterial  
72 parasites and transitions from bats to other mammals. Research has concluded that bats are potentially  
73 ancestral hosts that influenced the diversification and spread of coronaviruses (9), lyssaviruses (10),  
74 paramyxoviruses (11), trypanosomes (12), and haemosporidia (13) among other mammalian orders.  
75 Drawing from Hamilton *et al.* (14), who developed the ‘bat-seeding’ hypothesis to explain the  
76 geographic and host distribution of *Trypanosoma* lineages related to the agent of Chagas disease, *T.*  
77 *cruzi*, we hypothesize that bats may have also been influential in the ancient diversification and spread  
78 of *Bartonella*.

79 Successful amplification of *Bartonella* DNA from recent fossils points to a prolonged history of  
80 *Bartonella* infection in some hosts, such as humans and domestic cats (15). However, it is unlikely that  
81 DNA could be successfully amplified from more ancient fossils to test hypotheses about the origin of  
82 bartonellae in mammals. Instead, a molecular clock approach can be used to estimate the rate at which  
83 substitutions accumulate in *Bartonella* DNA and then extrapolate divergence dates of clades.  
84 Considering new research has shown that mammal-associated bartonellae evolved from arthropod  
85 symbionts (16), we rely on a molecular clock for the 16S ribosomal RNA (rRNA) gene based on  
86 sequence divergence data from bacterial symbionts of arthropod hosts separated for millions of years

87 (17). We perform a multi-locus analysis using the most comprehensive database of *Bartonella* strains to  
88 date, including a greater number of loci than a recent time tree analysis (18) and broader taxon  
89 sampling than previous genomic analyses (19). Many new *Bartonella* strains have recently been  
90 discovered in bats (20), so we have included 121 novel strains of bats in this study to amend current  
91 delineation of *Bartonella* clades (19) and to determine the influence of bats on the diversification and  
92 spread of *Bartonella* bacteria to other mammalian orders.

93       Using this molecular clock approach, we extrapolate when the genus *Bartonella* diversified and  
94 compare the timing of *Bartonella* clade diversification along with their hosts. We hypothesize that  
95 mammal-infecting bartonellae evolved with their hosts starting in the late Cretaceous or early  
96 Paleogene when many eutherian and metatherian taxa diversified (21). We expect to see clustering of  
97 lineages associated by host orders and correlation between diversification dates of hosts and *Bartonella*  
98 clades. Using ancestral state reconstruction and network analysis, we discern which orders of mammals  
99 were highly influential in the diversification and spread of *Bartonella* to other host orders and  
100 geographic regions. We predict that the speciose orders of bats (Chiroptera) and rodents (Rodentia) are  
101 important in the historical expansion of the *Bartonella* genus, however bats may have a more profound  
102 influence in this process because of their ability to fly and quickly disperse over wide areas. This study  
103 provides a more complete understanding of *Bartonella* evolution and biogeography and the role of bats  
104 as important hosts of pathogens through a suite of phylogenetic methods that can be adapted to  
105 understand these processes in other host-specific parasites and symbionts. Such investigations could  
106 lead to a deeper evolutionary understanding of symbiosis and parasitism and the identification of key  
107 host groups in the diversification and spread of these organisms.

108

## 109 **Materials and methods**

### 110 *Molecular data collection*

111 To balance the need for increased taxon sampling and adequate sequence data to produce a  
112 well-supported phylogeny, we assembled a database of *Bartonella* sequences from published genomes  
113 on GenBank, previous studies using multi-locus sequence analysis (MLSA), and archived cultures from  
114 bats. We targeted nine genetic markers (SI Appendix, Table S1) commonly used for *Bartonella*  
115 detection and phylogenetic analysis (22). Data from MLSA studies and genomes published as of 2018  
116 were collected from GenBank via accession numbers or strain numbers from 74 studies (SI Dataset 1),  
117 including recent publications that have isolated bartonellae or related bacterial symbionts in arthropods  
118 and past studies characterizing bat-associated *Bartonella* strains from Asia, Africa, and North America.  
119 We excluded any strains that were noted in the studies as showing evidence of homologous  
120 recombination between *Bartonella* species to prevent issues with incomplete lineage sorting in  
121 phylogenetic analysis. Additional molecular data collection of *Bartonella* strains from bats included a  
122 subset of cultures archived in our laboratory from previous studies in Africa, North and South America,  
123 Europe, and Asia that have been partially characterized at some of the targeted loci, as well as new  
124 cultures from bats sampled from Nigeria in 2010 and Guatemala in 2010, 2014, and 2015. The data  
125 combined from bat-associated *Bartonella* strains cover 50 species from 10/20 extant chiropteran  
126 families (8). Details on sequencing of bat-associated *Bartonella* strains, alignment, data cleaning, and  
127 validation can be found in SI Appendix. The final database contained sequence data from 332 taxa: 209  
128 *Bartonella* reference strains from genomes and MLSA studies, 121 bat-associated strains from our  
129 laboratory archive, the ant symbiont *Candidatus Tokpelaia hoelldoblerii*, and the outgroup *Brucella*  
130 *abortus* (SI Datasets 1 and 2).

131

132 *Phylogenetic analysis*

133 Bayesian phylogenetic analysis was performed using BEAST v1.8.4 (23) via the  
134 CyberInfrastructure for Phylogenetic REsearch (CIPRES) Science Gateway portal v3.3 (24). The nine  
135 loci were analyzed separately using GTR+I+G sequence evolution models, estimated base frequencies,  
136 four gamma rate categories, an uncorrelated relaxed clock with an exponential distribution of clock  
137 rates along branches for each locus, and a birth-death speciation model with incomplete sampling (25).  
138 *Brucella abortus* was set as the outgroup in all analyses. To determine a clock prior for the 16S rRNA  
139 locus, we analyzed published 16S rRNA sequence divergence and host divergence times for bacterial  
140 symbionts of arthropods (17). A linear regression model was fit to the data in R (26) and a lognormal  
141 prior was estimated by moment matching to the normal distribution for the fitted mean and standard  
142 error of the slope (SI Appendix, Fig. S5). The prior distribution for the exponential clock rate for 16S  
143 rRNA was set to this lognormal distribution while prior distributions for the exponential clocks of the  
144 remaining eight loci were set to an approximate reference prior for continuous-time Markov chain  
145 (CTMC) rates (27). Thus, the 16S rRNA clock acts a strong prior and the rates for the other eight loci  
146 are estimated relative to the 16S rRNA rate. This approach allows for external validation of *Bartonella*  
147 diversification events based on host diversification dates without explicitly using host diversification  
148 dates as calibration points for the parasite tree. Extensive testing using alternative substitution (with or  
149 without codon partitioning), clock, and tree models and subsets of genetic data determined that model  
150 choice or the exclusion of the ITS locus had little influence on tree topology and estimated divergence  
151 dates (SI Appendix, Table S5). Additional details regarding model priors and run settings can be found  
152 in SI Appendix.

153

154 *Ancestral state reconstruction*

155         In addition to divergence time estimation, we performed ancestral state reconstruction in  
156 BEAST. We assigned discrete traits to each tip based on the taxonomic order of the host and the  
157 ecozone (28) that includes the majority of the host's geographic range. The association of some  
158 *Bartonella* lineages with arthropods and not mammals are justified in SI Appendix. Ancestral state  
159 reconstruction was performed using a symmetrical rate model to reduce the number of state transitions  
160 that needed to be inferred.

161

162 *Tip-association tests*

163         We performed tip-association tests using the Bayesian Tip-association Significance testing  
164 (BaTS) program v1 to assess the clustering of traits along tips of the phylogenetic tree (29). We  
165 performed four sets of simulations using the same assignments of host orders and geographic ecozones  
166 used in the ancestral state reconstruction above. The two sets of traits were simulated on 1000 posterior  
167 sampled trees from the final BEAST run and on the single maximum likelihood (ML) tree. Clustering  
168 of traits was measured by the association index (AI) and parsimony score (PS), producing a distribution  
169 for the 1000 Bayesian trees and a single value for the ML tree. Null distributions for these measures  
170 were generated using 100 randomizations of traits onto tips of the trees. The significance of clustering  
171 was evaluated based on the overlap between observed values or distributions of AI and PS and their  
172 null distributions. For both measures, small values indicate a stronger phylogeny-trait association (29).

173

174 *Host clade definitions and divergence dates*

175         We defined host-associated *Bartonella* clades *a posteriori* based on high posterior support  
176 (>0.9) and clustering by host orders from the ancestral state reconstruction (Fig. 1A). Previous analyses  
177 of *Bartonella* host associations have shown that host-switching is common (30), so a calibration



178 approach that assumes strict cospeciation across the tree would not accurately reflect the evolutionary  
179 history of these bacteria. However, *Bartonella* lineages are broadly host-specific within orders (18) and  
180 host-switching is more frequent between closely related hosts (31). We defined 15 host-associated  
181 *Bartonella* clades (Tables S5-S6) at relevant taxonomic scales below the order level to test the  
182 hypothesis that *Bartonella* lineages diversified with their hosts while accounting for frequent host-  
183 switching that could occur within a host clade. We collated divergence dates for the most recent  
184 common ancestor uniting the host taxa of interest within each clade from available studies in the  
185 TimeTree database (<http://timetree.org/>), summarized by the estimated mean, 95% confidence  
186 intervals, and range of dates across studies (32). We then correlated these mean host divergence dates  
187 with our estimated median divergence date of the associated *Bartonella* clade (Table S7). A significant  
188 linear fit between these dates would support the hypothesis that *Bartonella* diversified within their  
189 hosts after colonization. To validate measurement of the divergence time for mammal-associated  
190 *Bartonella* clades with the ultrametric tree produced in BEAST, we also generated a calibrated timed  
191 phylogeny with the ML tree. Using the RelTime relative rate framework (33) within MEGA v10.0.5  
192 (34) we generated a timed phylogeny using host clade divergence dates from TimeTree (Table S7). We  
193 used confidence intervals (or ranges in the case of clade J) for the 15 host clade divergence dates as  
194 minimum and maximum divergence dates in RelTime. The program then calculated divergence dates  
195 on the tree using a maximum likelihood approach (33), producing mean estimates and 95% confidence  
196 intervals for clade dates that we could compare with the eubartonellae date estimated in BEAST. This  
197 analysis can confirm that the date estimation is robust to different approaches by comparing a  
198 calibration-based method on an existing tree to a method that relies on relaxed clock priors during tree  
199 estimation.

200

## 201 *Stochastic character mapping and network analysis*

202       To determine the inferred ancestral host order and ecozone of mammal-infecting eubartonellae,  
203 we initially inspected the results of the ancestral state reconstruction on the maximum clade credibility  
204 (MCC) tree. Specifically, we inspected the posterior support for the node and the posterior probability  
205 of the host order and ecozone at the node across all posterior trees. However, due to the large number  
206 of *Bartonella* lineages associated with Chiroptera in the database ( $n = 160$ ) relative to those in other  
207 diverse orders (Rodentia, 87; Artiodactyla, 32; Carnivora, 21), we tested the influence of this sampling  
208 bias on uncertainty about ancestral states using stochastic character mapping of host orders and  
209 ecozones onto trees (35). We wrote a custom R function to resample tips from the phylogenetic tree and  
210 perform stochastic character mapping on the pruned tree using the packages `ape` and `phytools` (36,  
211 37) assuming an equal-rates model. The function ran 100 mapping simulations on each pruned tree and  
212 calculated the probability that Chiroptera and Palearctic were the inferred host order and ecozone at the  
213 node uniting eubartonellae. These states were chosen based on initial reconstructions from BEAST  
214 indicating them as ancestral traits. We performed this simulation using three resampling schemes:  
215 equalizing the number of tips associated with bats and rodents ( $n = 87$ ), equalizing tips associated with  
216 bats, rodents, and artiodactyls ( $n = 32$ ), and equalizing tips associated with bats, rodents, artiodactyls,  
217 and carnivores ( $n = 21$ ). Resampling schemes were run with 100 resampling iterations on the MCC tree  
218 and 10 resampling steps on 10 randomly sampled posterior trees. We summarized the resulting  
219 probability distributions by the mean and interquartile range (SI Appendix, Table S11). We further  
220 assessed the nature of transitions between hosts and ecozones by performing additional stochastic  
221 character mapping simulations on posterior trees followed by network analysis of state transitions. Host  
222 orders and ecozones were simulated with `phytools` over 1000 posterior sampled trees with an equal-  
223 rates model. The number of state transitions were then summarized over all 1000 simulations by the  
224 median and 95% credible intervals, ignoring state transitions with a median of zero (SI Appendix, Table

225 S12). Separate host order and ecozone networks were then built from these median transitions, and  
226 node-level properties including degree, out-degree, and betweenness centrality were calculated using  
227 the R package `igraph` (38).

228

## 229 **Results**

### 230 *Phylogeny and age estimation of Bartonella genus*

231 Using molecular data from nine genetic loci sequenced from 331 *Bartonella* strains (SI  
232 Appendix, Table S1), we produced a well-supported Bayesian phylogeny (Fig. 1; SI Appendix, Fig. S8)  
233 that confirmed monophyletic clades of *Bartonella* species identified in past studies (19). These  
234 included a clade containing rodent-associated *B. elizabethae*, *B. grahamii*, *B. tribocorum*, and *B.*  
235 *rattimassiliensis* (clade H); a clade containing cat-associated *B. henselae* and *B. koehlerae* (clade F), *B.*  
236 *quintana*, and *B. washoensis* (clade E); and all three *B. vinsonii* subspecies (clade K). However, our  
237 approach has substantially altered the order of the deep branches within the phylogeny, including the  
238 delineation of five distinct *Bartonella* clades restricted to bats. Additional details regarding revisions to  
239 the *Bartonella* tree topology and clock rate estimates for sequenced loci can be found in SI Appendix.

240 Beyond a revised phylogeny, our approach demonstrated that bartonellae are ancient and  
241 supports the hypothesis that the genus diversified with mammals. We confirm that the genus first  
242 evolved as a symbiont of arthropods, represented by the species *B. apis*, *B. tamiiae* and the ant symbiont  
243 *Candidatus* Tokpelaia hoelldoblerii, before transitioning to a parasitic lifestyle in mammals. These  
244 mammal-infecting eubartonellae (excluding *B. apis* and *B. tamiiae*) began diversifying 62 million years  
245 ago (mya; 95% HPD: 40-90), near the Cretaceous-Paleogene boundary 66 mya (Fig. 1; SI Appendix,  
246 Fig. S6). Many crown metatherian and eutherian clades began diversifying around this time (21),  
247 including the diverse placental orders Chiroptera, Artiodactyla, Carnivora, Rodentia, and Primates,  
248 suggesting that *Bartonella* diversification is tightly linked with the radiation of its mammalian hosts

249 during the Paleogene. Estimates of divergence dates using alternative substitution, tree, and clock  
250 models placed the origin of mammal-infecting eubartonellae between 57-70 mya (SI Appendix, Table  
251 S4).

252

### 253 *Diversification of bartonellae with hosts*

254       Following the hypothesis that the *Bartonella* genus radiated with their mammal hosts, we  
255 performed tip-association tests to analyze the clustering of host taxonomic traits and geographic origin  
256 along the tips of the tree. Simulations using 1000 posterior sampled trees showed significant clustering  
257 of host orders and geographic ecozones across the phylogeny according to association indices (AI) and  
258 parsimony scores (PS). Observed distributions for both measures did not overlap their respective null  
259 distributions based on random associations of traits to tips (SI Appendix, Table S10). Host orders had  
260 smaller values for AI and PS than geographic origin, indicating a stronger phylogeny-trait association  
261 with host taxonomy than geographic origin. This phylogeny-trait association with host taxonomy is  
262 illustrated in Fig. 1A through strong support for monophyletic groups associated with host orders.

263       We clarified this association with host taxonomy by describing 15 *Bartonella* clades (SI  
264 Appendix, Tables S5 and S6) predominantly associated with marsupials (B), ruminants (C), carnivores  
265 (F), rodents (E, H, I, J, K, M, O), and bats (Fig. 1A). We then compared divergence dates of each  
266 *Bartonella* clade with divergence dates of the associated hosts within each clade (SI Appendix, Table  
267 S7) collated from TimeTree (32). We found a strong correlation between *Bartonella* and host clade  
268 divergence times ( $R^2 = 0.72$ ,  $F = 36.4$ ,  $P < 0.0001$ ). However, most (13/15) *Bartonella* clades were  
269 younger than their associated host clades; on average, the age of *Bartonella* clades was 76% that of  
270 their associated host clades (Fig. 2).

271       The Bayesian tree used in these analyses was similar to a maximum likelihood (ML) tree  
272 produced from concatenated sequences of all nine loci, with only minor differences in topology for

273 some internal branches and external branches with low bootstrap support (SI Appendix, Fig. S7). Tip-  
274 association tests using the ML tree showed similar results to the Bayesian tree (SI Appendix, Table  
275 S10). Using confidence intervals for host clade divergence dates provided from TimeTree as calibration  
276 dates on the ML tree within the RelTime relative rate framework (39), we estimated the origin of  
277 mammal-infecting eubartonellae at 66.3 mya (95% CI: 63.5-69.1). This separate analysis validates the  
278 Bayesian relaxed clock estimate (SI Appendix, Table S5) and further supports the inference that  
279 *Bartonella* began diversifying with mammals near the Cretaceous-Paleogene boundary.

280

### 281 *Influence of host groups and geography on Bartonella evolution*

282         Bats appear to be highly influential in the diversification and spread of *Bartonella*  
283 geographically and to other host orders. Bat-associated clades (A, D, G, L, N) are broadly distributed  
284 across the tree and form external branches to clades associated with other mammalian orders (Fig. 1A).  
285 This contrasts with clades associated with marsupials, ruminants, carnivores, and rodents, which are  
286 less dispersed on the tree and stem from more internal branches. Based on ancestral state analysis using  
287 host orders as states, bats were inferred to be the ancestral host of all mammal-infecting eubartonellae  
288 with a posterior probability of 0.99. Due to the large number of bat-associated strains in the database ( $n$   
289 = 160), this inference of the ancestral host may have been biased towards bats. Yet in all resampling  
290 scenarios, the median posterior probability that bats are the ancestral hosts of mammal-infecting  
291 eubartonellae exceeded 0.9 (SI Appendix, Table S11). In further support of this inference, the  
292 diversification of mammal-infecting *Bartonella* started almost exactly when bats began their  
293 evolutionary radiation around 62 mya (95% CI: 59-64, range: 51.9-74.9) according to compiled studies  
294 from TimeTree (32).

295         In addition to ancestral host associations, we also inferred the ancestral biogeography of  
296 *Bartonella* clades and where host transitions may have occurred. We performed ancestral state

297 reconstruction of ecozones based on the current geographical distribution of the host of each  
298 *Bartonella* strain. The geographical origin of eubartonellae was inferred to be in the Palearctic (Fig.  
299 1B) with a posterior probability of 0.99. This fits with the classification of bats within the clade  
300 Laurasiatheria and previous reconstructions of chiropteran biogeography which found that extant bats  
301 may have originated in Eurasia (40). However, the inference of the geographic origin of eubartonellae  
302 is less certain when host sampling bias was accounted for in the stochastic character mapping analysis.  
303 The median posterior probability for a Palearctic origin of eubartonellae ranged from 0.63 to 0.77  
304 across all resampling scenarios (SI Appendix, Table S11). Regardless of the exact geographical origin,  
305 it is probable that bats have been influential in the ancient geographic spread of *Bartonella* infections  
306 (Fig. 1).

307         We explored the influence of particular hosts on the spread of *Bartonella* among mammalian  
308 orders and across ecozones using stochastic character mapping and network analysis. After mapping  
309 the number of host and ecozone transitions across 1000 posterior sampled trees, we built a network  
310 consisting of host and ecozones as nodes and the median number of transitions between nodes as edges  
311 (Fig. 3; SI Appendix, Table S12). In general, the ecozone network was more highly connected than the  
312 host network (Fig. 3). The higher number of connections in the ecozone network corresponds with the  
313 results of the tip-association tests (SI Appendix, Table S10), which showed that clustering of traits was  
314 stronger for host taxonomy than geographic origin. That is, the high frequency of transitions between  
315 ecozones leads to lower levels of geographical clustering on the tree.

316         Examining the network properties of the nodes, we find that certain host orders are influential in  
317 the spread of *Bartonella* among host orders (SI Appendix, Table S13). In particular, we considered  
318 degree (the number of edges connected to a node), out-degree (the number of edges originating from a  
319 node), and betweenness (the number of shortest paths that connect any two nodes in the network that  
320 pass through the node in question) because these measures describe how each node serves as a source

321 of *Bartonella* to other nodes. Bats and rodents were a source to other mammalian orders (Fig. 3A), with  
322 the highest degree and out-degree of all host orders and high betweenness (SI Appendix, Table S13).  
323 Transitions between ecozones show that the historical movement of *Bartonella* by hosts led to the  
324 present global distribution of these bacteria (Fig. 1B) through bidirectional exchange (Fig. 3B).  
325 Palearctic and Indo-Malayan ecozones showed the highest degree, out-degree, and betweenness. Thus,  
326 these two regions may have played an important role as geographic hubs for *Bartonella* diversification  
327 and movement of hosts to other ecozones (Fig. 1B; SI Appendix, Fig. S8B).

328

## 329 Discussion

330 *Bartonella* is a broadly distributed bacterial genus associated with mammals and arthropod  
331 vectors globally. Patterns of host-specificity and phylogenetic diversity in this genus reflect general  
332 trends in other zoonotic pathogens. Thus, *Bartonella* serves as a model system for understanding the  
333 evolution and ecology of zoonotic agents. Specifically, this system could inform theory about how  
334 agents adapt to and diversify in hosts over time and the ecological conditions that lead to accidental  
335 infections and host-switching. Using a multi-faceted analytical approach, this study answered several  
336 key questions about the evolution of *Bartonella* bacteria. First, we found that the *Bartonella* genus  
337 began diversifying with mammals around the Cretaceous-Paleogene boundary. Our novel approach  
338 used a strong relaxed clock prior on the 16S rRNA locus based on substitution rates observed in  
339 bacterial symbionts of arthropods (17) while accounting for rate variation at eight other genetic loci to  
340 yield a highly supported phylogenetic tree with estimated divergence dates. Second, we showed that  
341 *Bartonella* clades diversified along with their mammalian hosts. Ancestral state reconstruction on the  
342 phylogenetic tree showed that *Bartonella* lineages tend to cluster by host taxonomic orders and this  
343 clustering was found to be significantly higher than random expectations using tip-association tests.  
344 Additionally, we found a significant correlation between the divergence times of 15 *Bartonella* clades

346 and their associated host clades. A separate time tree estimation approach calibrated using these host  
347 divergence dates confirmed the dating of eubartonellae diversification. The use of ancestral state  
348 reconstruction or stochastic character mapping of host traits paired with network analysis is a nascent  
349 approach in the study of infectious agents that can provide additional insights from phylogenies (41–  
350 43). These analyses demonstrated that bats have been key to both the origin and spread of *Bartonella*  
351 among other mammals and geographic regions, while rodents were responsible for additional spread.  
352 This work elucidates key aspects of the ecology and evolution of *Bartonella*, yet there are several  
353 avenues of research to be explored in future studies.

354         One necessity is to thoroughly catalog *Bartonella* diversity. While description of *Bartonella*  
355 species was slow through the 20<sup>th</sup> century, the advent of genetic sequencing has brought about an  
356 explosion of *Bartonella* diversity with over 40 named and likely many other unnamed species. Our  
357 phylogenetic analysis used the most comprehensive sequence database to date, including broad taxon  
358 sampling of *Bartonella* strains characterized from 10 mammalian orders. These data, along with a  
359 relaxed clock approach, have reshaped the *Bartonella* phylogeny, defining five new clades of bat-  
360 associated *Bartonella* strains and reorganizing the relationships of deeply branching clades. Attempts to  
361 culture and characterize novel *Bartonella* strains from undersampled mammalian orders or other  
362 potential vertebrate hosts (e.g., birds (44)) are needed to further improve taxon sampling. This  
363 continued work will undoubtedly reshape the *Bartonella* tree further and may lead to new hypotheses  
364 about ancient associations with hosts.

365         Our results also provide context to the biological changes that are associated with the shift of  
366 *Bartonella* bacteria from an arthropod symbiont to a mammal parasite. Our phylogeny reaffirms work  
367 demonstrating this shift (16, 18) and provides an estimated time for when it occurred, suggesting that  
368 an existing bacterial population colonized a new niche in mammals shortly after their emergence as  
369 potential hosts. Some of the molecular machinery that could have facilitated this colonization was



370 already present in arthropod-associated *Bartonella* lineages and other Rhizobiales bacteria (16). The  
371 majority of virulence factors important for host interaction or establishment of intracellular infection  
372 are shared across Bartonellaceae, suggesting some latent potential for infecting vertebrates even in  
373 arthropod-associated lineages. However, the evolutionary radiation of eubartonellae is associated with a  
374 number of other important molecular innovations, including the loss of flagella and acquisition of *trw*  
375 and *virB* type IV secretion systems (T4SS) (16, 19, 45, 46). Secretion systems have only been detected  
376 and characterized in a few *Bartonella* species across the phylogeny, so our revision of *Bartonella* tree  
377 topology highlights a need for future work regarding the machinery (e.g., flagella, T4SS) shared  
378 between bat-associated lineages and their relatives.

379         Given that current mammal-associated bartonellae are vectored by blood-feeding arthropods  
380 and ancestral bartonellae were likely arthropod symbionts, it is probable that early adaptation to blood-  
381 feeding arthropods facilitated the colonization of the mammalian bloodstream. Hematophagous  
382 arthropods frequently harbor endosymbionts to cope with their nutritionally deficient diet (47), so  
383 ancient (and possibly some extant) bartonellae may have had beneficial relationships with arthropod  
384 hosts. The switch from symbiont to mammal parasite could then have occurred early in the evolution of  
385 mammals. There is evidence that ancestors of extant mammalian ectoparasites implicated as *Bartonella*  
386 vectors (48–50) were already present by the end of the Cretaceous, including sand flies (51), fleas (1),  
387 sucking lice (52), bed bugs (2), and hippoboscoid flies (53). Based on available evidence, the  
388 colonization of mammals by *Bartonella* bacteria may have occurred via hematophagous vector,  
389 possibly parasitizing early bats. An ancestral relationship with bats is supported by recent detection of  
390 *B. tamiae* in bat flies and bat spleens (54, 55), suggesting that this species can opportunistically  
391 colonize bats from arthropods even today. The initial transmission may have occurred through  
392 contamination of skin with arthropod feces containing bacteria, direct consumption of an infected  
393 arthropod, or some other unknown route (4). Once inside the host, the existing ability of bartonellae to

394 invade host cells may have led to proliferation of bacteria in the blood. Additional studies that isolate  
395 *Bartonella* lineages in arthropods and confirm potential transmission routes between mammal hosts and  
396 arthropod vectors will clarify the evolution of host-vector-*Bartonella* relationships.

397       As apparent in Figs. 1 and 3, the evolutionary history of *Bartonella* has involved several host-  
398 switching events. Thus, calibrating divergence dates by relying on codivergence between host taxa  
399 would poorly reflect this history. Instead we initially avoided a calibration approach in favor of using a  
400 relaxed clock prior, then validated estimated divergence dates based on 15 radiation events within  
401 particular bat, rodent, ruminant, and marsupial host taxa. The *Bartonella* divergence dates correlate  
402 strongly with the host divergence dates, although with a widespread delay in the colonization of  
403 *Bartonella* within a clade (Fig. 2). While it is possible that this delay in *Bartonella* colonization is  
404 associated with the divergence date estimation approach and bacteria diverged immediately along with  
405 their hosts, we suspect the delay reflects some biological reality. According to Manter's rules (56, 57),  
406 parasites evolve more slowly than their hosts due to the relatively uniform environments they  
407 experience within a host. This slow evolution may help to explain rampant *Bartonella* host-switching  
408 between related hosts in the tree, since from a parasite's perspective the intracellular environments of  
409 phylogenetically similar hosts are unlikely to have significantly changed. Despite these inherent delays,  
410 the clustering of *Bartonella* strains with host orders and particular clades within those orders along with  
411 the correlation of divergence times strongly suggest a shared evolutionary history between *Bartonella*  
412 strains and their hosts, although a more complicated one than simple cospeciation.

413       Beyond patterns of codiversification, it is clear from this study that *Bartonella* evolution has  
414 been shaped by certain hosts, particularly rodents and bats. As the two most speciose groups of  
415 mammals, they could be expected to host diverse parasites according to Eichler's rule (58), which  
416 predicts positive covariance between host and parasite diversity. While more studies will need to be  
417 done to explicitly test patterns of host and *Bartonella* diversity while accounting for sampling biases, it

418 is clear from the network analysis that rodents and bats are important sources of bartonellae to other  
419 hosts (Fig. 3). As abundant taxa within ecosystems, rodents and bats could act as targets for both  
420 generalist and specialist ectoparasites. While endemic *Bartonella* infections are likely maintained by  
421 transmission by specialist ectoparasite vectors, generalist vectors could target the most abundant  
422 species in the community (e.g., rodents or bats) and occasionally infest alternative hosts, resulting in  
423 opportunities for accidental *Bartonella* infections in phylogenetically distant hosts over evolutionary  
424 time (31). Reconstructing some of these ancient host-switching dynamics would require knowledge of  
425 ancestral ectoparasite associations and the interactions of hosts and their ectoparasites within  
426 communities.

427       Finally, bats were identified as the most probable ancestral host of eubartonellae in mammals  
428 even after accounting for sampling bias in the database. The fact that bats can fly would have  
429 hypothetically increased their dispersal ability during their early diversification. This is exemplified by  
430 numerous long-distance colonization events: from mainland Africa to Madagascar by seven different  
431 extant bat families, including the endemic Myzopodidae; from Australia to New Zealand by the family  
432 Mystacinidae; and from mainland North America to Hawaii by *Lasiurus cinereus* (59). The dispersal of  
433 bats to distant landmasses during the early diversification of extant mammals could have played a role  
434 in the importance of bats as sources of *Bartonella* infection to other hosts. We also note that bats appear  
435 to be highly tolerant of infections, especially of intracellular bacteria and viruses (60), showing few  
436 signs of disease and unique immune responses compared to other mammals (7, 61–63). Such patterns  
437 in extant bats may have ancient origins linked with their ability to fly (64) and thus bats may have been  
438 ideal hosts for the early colonization of mammals by arthropod-borne bartonellae.

439       The importance of bats in the evolutionary diversification of mammal parasites has been  
440 discussed by other authors working in distinct systems. One of these groups are the *Trypanosoma*  
441 parasites that include *T. cruzi*, the agent of Chagas disease. Observing the broad distribution of bat-

442 associated clades in the growing diversity of trypanosomes, Hamilton and others hypothesized that bats  
443 may have been highly influential in the geographic spread of the *T. cruzi* clade and host-switching to  
444 other mammals (14). This ‘bat-seeding’ hypothesis has continued to gain support since it was proposed  
445 with the discovery of diverse lineages in the *T. cruzi* clade in bats globally (12, 41). Similar patterns  
446 have been noted in malarial parasites (Haemosporida), wherein the transition from sauropsids into  
447 mammals likely occurred only once, with bats being a possible bridge to other mammals (13, 65). In  
448 light of the results of this study and the patterns in other systems, we contend that the ‘bat-seeding’  
449 hypothesis may apply more widely among mammalian parasites. Our approach using comprehensive  
450 phylogenetic analysis, estimation of divergence times, and ancestral reconstruction of host associations  
451 could be applied to understand the evolutionary radiation and host-switching patterns of these parasites,  
452 and potentially the role that bats have played in their diversification.

453

#### 454 **Acknowledgements**

455 We thank the members of the Webb laboratory for their suggestions on early drafts of this  
456 manuscript. The findings and conclusions in this report are those of the authors and do not necessarily  
457 represent the official position of CDC.

458

#### 459 **Author contributions**

460 C.M. and M.K. designed research; C.M., Y.B., and M.K. performed research; C.M. analyzed data; and  
461 C.M. and C.W. wrote the paper.

462

#### 463 **References**

464 1. Zhu Q, Hastriter MW, Whiting MF, Dittmar K (2015) Fleas (Siphonaptera) are Cretaceous, and  
465 evolved with Theria. *Mol Phylogenet Evol* 90:129–139.

- 466 2. Roth S, et al. (2019) Bedbugs evolved before their bat hosts and did not co-speciate with ancient  
467 humans. *Curr Biol* 29(11):1847–1853.
- 468 3. Kosoy MY (2010) Ecological associations between bacteria of the genus *Bartonella* and  
469 mammals. *Biol Bull* 37(7):716–724.
- 470 4. Harms A, Dehio C (2012) Intruders below the radar: molecular pathogenesis of *Bartonella* spp.  
471 *Clin Microbiol Rev* 25(1):42–78.
- 472 5. Vayssier-Taussat M, Le Rhun D, Bonnet S, Cotté V (2009) Insights in *Bartonella* host  
473 specificity. *Ann N Y Acad Sci* 1166(1):127–132.
- 474 6. Calisher CH, Childs JE, Field HE, Holmes K V, Schountz T (2006) Bats: important reservoir  
475 hosts of emerging viruses. *Clin Microbiol Rev* 19(3):531–545.
- 476 7. Banerjee A, et al. (2020) Novel insights into immune systems of bats. *Front Immunol*  
477 11(January):1–15.
- 478 8. Shi JJ, Rabosky DL (2015) Speciation dynamics during the global radiation of extant bats.  
479 *Evolution (N Y)* 69(6):1528–1545.
- 480 9. Cui J, Li F, Shi ZL (2019) Origin and evolution of pathogenic coronaviruses. *Nat Rev Microbiol*  
481 17(3):181–192.
- 482 10. Badrane H, Tordo N (2001) Host switching in Lyssavirus history from the Chiroptera to the  
483 Carnivora orders. *J Virol* 75(17):8096–8104.
- 484 11. Drexler JF, et al. (2012) Bats host major mammalian paramyxoviruses. *Nat Commun* 3:796.
- 485 12. Espinosa-Álvarez O, et al. (2018) *Trypanosoma rangeli* is phylogenetically closer to Old World  
486 trypanosomes than to *Trypanosoma cruzi*. *Int J Parasitol* 48(7):569–584.
- 487 13. Galen SC, et al. (2018) The polyphyly of *Plasmodium*: comprehensive phylogenetic analyses of  
488 the malaria parasites (order Haemosporida) reveal widespread taxonomic conflict. *R Soc Open*  
489 *Sci* 5:171780.

- 490 14. Hamilton PB, Teixeira MM, Stevens JR (2012) The evolution of *Trypanosoma cruzi*: the ‘bat  
491 seeding’ hypothesis. *Trends Parasitol* 28(4):136–141.
- 492 15. Fournier P-E, Drancourt M, Aboudharam G, Raoult D (2015) Paleomicrobiology of *Bartonella*  
493 infections. *Microbes Infect* 17(11–12):879–883.
- 494 16. Segers FHID, Kešnerová L, Kosoy M, Engel P (2017) Genomic changes associated with the  
495 evolutionary transition of an insect gut symbiont into a blood-borne pathogen. *ISME J*:1–13.
- 496 17. Kuo C-H, Ochman H (2009) Inferring clocks when lacking rocks: the variable rates of molecular  
497 evolution in bacteria. *Biol Direct* 4(1):35.
- 498 18. Frank HK, Boyd SD, Hadly EA (2018) Global fingerprint of humans on the distribution of  
499 *Bartonella* bacteria in mammals. *PLoS Negl Trop Dis* 12(11):e0006865.
- 500 19. Harms A, et al. (2017) Evolutionary dynamics of pathoadaptation revealed by three independent  
501 acquisitions of the VirB/D4 type IV secretion system in *Bartonella*. *Genome Biol Evol* 9(3):761–  
502 776.
- 503 20. McKee CD, Hayman DTS, Kosoy MY, Webb CT (2016) Phylogenetic and geographic patterns  
504 of bartonella host shifts among bat species. *Infect Genet Evol* 44:382–394.
- 505 21. Phillips MJ (2016) Geomolecular dating and the origin of placental mammals. *Syst Biol*  
506 65(3):546–557.
- 507 22. Kosoy M, McKee C, Albayrak L, Fofanov Y (2018) Genotyping of *Bartonella* bacteria and their  
508 animal hosts: current status and perspectives. *Parasitology* 145(5):543–562.
- 509 23. Drummond AJ, Rambaut A (2007) BEAST: Bayesian evolutionary analysis by sampling trees.  
510 *BMC Evol Biol* 7(1):214.
- 511 24. Miller MA, Pfeiffer W, Schwartz T (2010) Creating the CIPRES Science Gateway for inference  
512 of large phylogenetic trees. *Proceedings of the Gateway Computing Environments Workshop*  
513 (GCE), pp 1–8.

- 514 25. Stadler T (2009) On incomplete sampling under birth–death models and connections to the  
515 sampling-based coalescent. *J Theor Biol* 261(1):58–66.
- 516 26. R Core Team (2019) R: a language and environment for statistical computing. *R Found Stat*  
517 *Comput Vienna, Austria*. Available at: <http://www.r-project.org>.
- 518 27. Ferreira MAR, Suchard MA (2008) Bayesian analysis of elapsed times in continuous-time  
519 Markov chains. *Can J Stat* 36(3):355–368.
- 520 28. Olson DM, et al. (2001) Terrestrial ecoregions of the world: a new map of life on Earth.  
521 *Bioscience* 51(11):933–938.
- 522 29. Parker J, Rambaut A, Pybus OG (2008) Correlating viral phenotypes with phylogeny:  
523 accounting for phylogenetic uncertainty. *Infect Genet Evol* 8(3):239–246.
- 524 30. Lei BR, Olival KJ (2014) Contrasting patterns in mammal-bacteria coevolution: *Bartonella* and  
525 *Leptospira* in bats and rodents. *PLoS Negl Trop Dis* 8(3):e2738.
- 526 31. McKee CD, et al. (2019) Host phylogeny, geographic overlap, and roost sharing shape parasite  
527 communities in European bats. *Front Ecol Evol* 7(March):69.
- 528 32. Kumar S, Stecher G, Suleski M, Hedges SB (2017) TimeTree: a resource for timelines,  
529 timetrees, and divergence times. *Mol Biol Evol* 34(7):1812–1819.
- 530 33. Tamura K, et al. (2012) Estimating divergence times in large molecular phylogenies. *Proc Natl*  
531 *Acad Sci* 109(47):19333–19338.
- 532 34. Kumar S, Stecher G, Li M, Knyaz C, Tamura K (2018) MEGA X: molecular evolutionary  
533 genetics analysis across computing platforms. *Mol Biol Evol* 35(6):1547–1549.
- 534 35. Huelsenbeck JP, Nielsen R, Bollback JP (2003) Stochastic mapping of morphological characters.  
535 *Syst Biol* 52(2):131–158.
- 536 36. Paradis E, Claude J, Strimmer K (2004) APE: analyses of phylogenetics and evolution in R  
537 language. *Bioinformatics* 20(2):289–290.

- 538 37. Revell LJ (2012) phytools: an R package for phylogenetic comparative biology (and other  
539 things). *Methods Ecol Evol* 3(2):217–223.
- 540 38. Csárdi G, Nepusz T (2006) The igraph software package for complex network research.  
541 *InterJournal Complex Syst* 1695:1695.
- 542 39. Tamura K, Tao Q, Kumar S (2018) Theoretical foundation of the RelTime method for estimating  
543 divergence times from variable evolutionary rates. *Mol Biol Evol* 35(7):1770–1782.
- 544 40. Teeling EC, et al. (2005) A molecular phylogeny for bats illuminates biogeography and the fossil  
545 record. *Science (80- )* 307(5709):580–584.
- 546 41. Clément L, et al. (2020) Out of Africa: the origins of the protozoan blood parasites of the  
547 *Trypanosoma cruzi* clade found in bats from Africa. *Mol Phylogenet Evol* 145(September  
548 2019):106705.
- 549 42. Kellner A, et al. (2018) Transmission pathways and spillover of an erythrocytic bacterial  
550 pathogen from domestic cats to wild felids. *Ecol Evol* (July):1–14.
- 551 43. Faria NR, Suchard M a, Rambaut A, Streicker DG, Lemey P (2013) Simultaneously  
552 reconstructing viral cross-species transmission history and identifying the underlying constraints.  
553 *Philos Trans R Soc B* 368(1614):20120196–20120196.
- 554 44. Williams HM, Dittmar K (2020) Expanding our view of *Bartonella* and its hosts: *Bartonella* in  
555 nest ectoparasites and their migratory avian hosts. *Parasit Vectors* 13(1):13.
- 556 45. Engel P, et al. (2011) Parallel evolution of a type IV secretion system in radiating lineages of the  
557 host-restricted bacterial pathogen *Bartonella*. *PLOS Genet* 7(2):e1001296.
- 558 46. Wagner A, Dehio C (2019) Role of distinct type-IV-secretion systems and secreted effector sets  
559 in host adaptation by pathogenic *Bartonella* species. *Cell Microbiol* 21(3):e13004.
- 560 47. Husnik F (2018) Host–symbiont–pathogen interactions in blood-feeding parasites: nutrition,  
561 immune cross-talk and gene exchange. *Parasitology* 145(10):1294–1303.



- 562 48. Tsai Y-L, Chang C-C, Chuang S-T, Chomel BB (2011) *Bartonella* species and their  
563 ectoparasites: selective host adaptation or strain selection between the vector and the mammalian  
564 host? *Comp Immunol Microbiol Infect Dis* 34(4):299–314.
- 565 49. McKee CD, et al. (2018) Survey of parasitic bacteria in bat bugs, Colorado. *J Med Entomol*  
566 55(1):237–241.
- 567 50. Leulmi H, et al. (2015) Competence of *Cimex lectularius* bed bugs for the transmission of  
568 *Bartonella quintana*, the agent of trench fever. *PLoS Negl Trop Dis* 9(5):e0003789.
- 569 51. Akhoundi M, et al. (2016) A historical overview of the classification, evolution, and dispersion  
570 of *Leishmania* parasites and sandflies. *PLoS Negl Trop Dis* 10(3):e0004349.
- 571 52. Light JE, Smith VS, Allen JM, Durden LA, Reed DL (2010) Evolutionary history of mammalian  
572 sucking lice (Phthiraptera: Anoplura). *BMC Evol Biol* 10(1):292.
- 573 53. de Moya RS (2019) Implications of a dating analysis of Hippoboscoidea (Diptera) for the origins  
574 of phoresis in feather lice (Psocodea: Phthiraptera: Philoptera). *Insect Syst Divers* 3(4):1–5.
- 575 54. Leulmi H, et al. (2016) Detection of *Bartonella tamiae*, *Coxiella burnetii* and rickettsiae in  
576 arthropods and tissues from wild and domestic animals in northeastern Algeria. *Parasit Vectors*  
577 9(1):27.
- 578 55. Bai Y, et al. (2018) Human exposure to novel *Bartonella* species from contact with fruit bats.  
579 *Emerg Infect Dis* 24(12):2317–2323.
- 580 56. Manter HW (1955) The zoogeography of trematodes of marine fishes. *Exp Parasitol* 4(1):62–86.
- 581 57. Manter HW (1966) Parasites of fishes as biological indicators of recent and ancient conditions.  
582 *Host-Parasite Relationships*, ed McCauley JE (Oregon State University Press, Corvallis), pp 59–  
583 71.

- 584 58. Eichler W (1942) Die Entfaltungsregel und andere Gesetzmäßigkeiten in den  
585 parasitogenetischen Beziehungen der Mallophagen und anderer ständiger Parasiten zu ihren  
586 Wirten. *Zool Anz* 137:77–83.
- 587 59. Eick GN, Jacobs DS, Matthee CA (2005) A nuclear DNA phylogenetic perspective on the  
588 evolution of echolocation and historical biogeography of extant bats (Chiroptera). *Mol Biol Evol*  
589 22(9):1869–1886.
- 590 60. Brook CE, Dobson AP (2015) Bats as ‘special’ reservoirs for emerging zoonotic pathogens.  
591 *Trends Microbiol* 23(3):172–180.
- 592 61. Hayman DTS (2019) Bat tolerance to viral infections. *Nat Microbiol* 4(5):728–729.
- 593 62. Ahn M, et al. (2019) Dampened NLRP3-mediated inflammation in bats and implications for a  
594 special viral reservoir host. *Nat Microbiol* 4(5):789–799.
- 595 63. Schountz T, Baker ML, Butler J, Munster V (2017) Immunological control of viral infections in  
596 bats and the emergence of viruses highly pathogenic to humans. *Front Immunol* 8(September).  
597 doi:10.3389/fimmu.2017.01098.
- 598 64. Zhang G, et al. (2013) Comparative analysis of bat genomes provides insight into the evolution  
599 of flight and immunity. *Science* 339(6118):456–60.
- 600 65. Lutz HL, et al. (2016) Diverse sampling of East African haemosporidians reveals chiropteran  
601 origin of malaria parasites in primates and rodents. *Mol Phylogenet Evol* 99:7–15.
- 602

### 603 **Figure legends**

604 **Fig. 1.** Evolution of *Bartonella* lineages, host associations, and geographic origins. Timed maximum  
605 clade credibility tree of *Bartonella* lineages. Tips are collapsed into clades of related *Bartonella* species  
606 and strains (SI Appendix, Tables S5 and S6); the number of tips in each clade is shown in brackets.  
607 Posterior probabilities (PP) for nodes are indicated by the size of circles; ancient nodes had strong  
608 support (PP = 1), unless otherwise labeled. Branch lengths are in millions of years. Ancestral state  
609 reconstruction of (A) host order and (B) ecozone transitions was performed during the estimation of  
610 diversification times. Branches are colored according to their most probable (PP > 0.5) host order or  
611 ecozone states, with host or ecozone probability shown by the color of circles at each node. The  
612 Cretaceous-Paleogene extinction event is drawn as a gray line at 66 million years ago.

613

614 **Fig. 2.** Comparison of divergence dates between *Bartonella* clades and associated host mammal clades.  
615 (A) Divergence times and intervals for *Bartonella* (in orange) and host clades (in purple). Black points  
616 show the median estimates and thin bars show divergence date ranges. Thick bars for mammal clades  
617 are the 95% confidence intervals estimated from TimeTree and the same bars for *Bartonella* clades are  
618 the 95% HPD intervals. (B) Correlation of median divergence dates between host and *Bartonella*  
619 clades, with clade identifiers shown as points. The solid green line indicates the best linear fit through  
620 the points and the dashed grey line shows the 1:1 line if host and *Bartonella* divergence dates were  
621 equal.

622

623 **Fig. 3.** Transition network for (A) host orders and (B) ecozones across the *Bartonella* phylogeny. Edges  
624 connecting nodes are the median number of transitions between host and ecozone states based on  
625 stochastic character mapping on 1000 posterior sampled trees. Edge widths are proportional to the  
626 median number of transitions. Edges with a median of zero transitions are not shown. Transitions

627 between the outgroup (*Brucella abortus*) and between mammalian orders and arthropods have been  
628 removed for clarity. All transition counts with a median above zero are shown in SI Appendix, Table  
629 S9.

**Fig. 1**

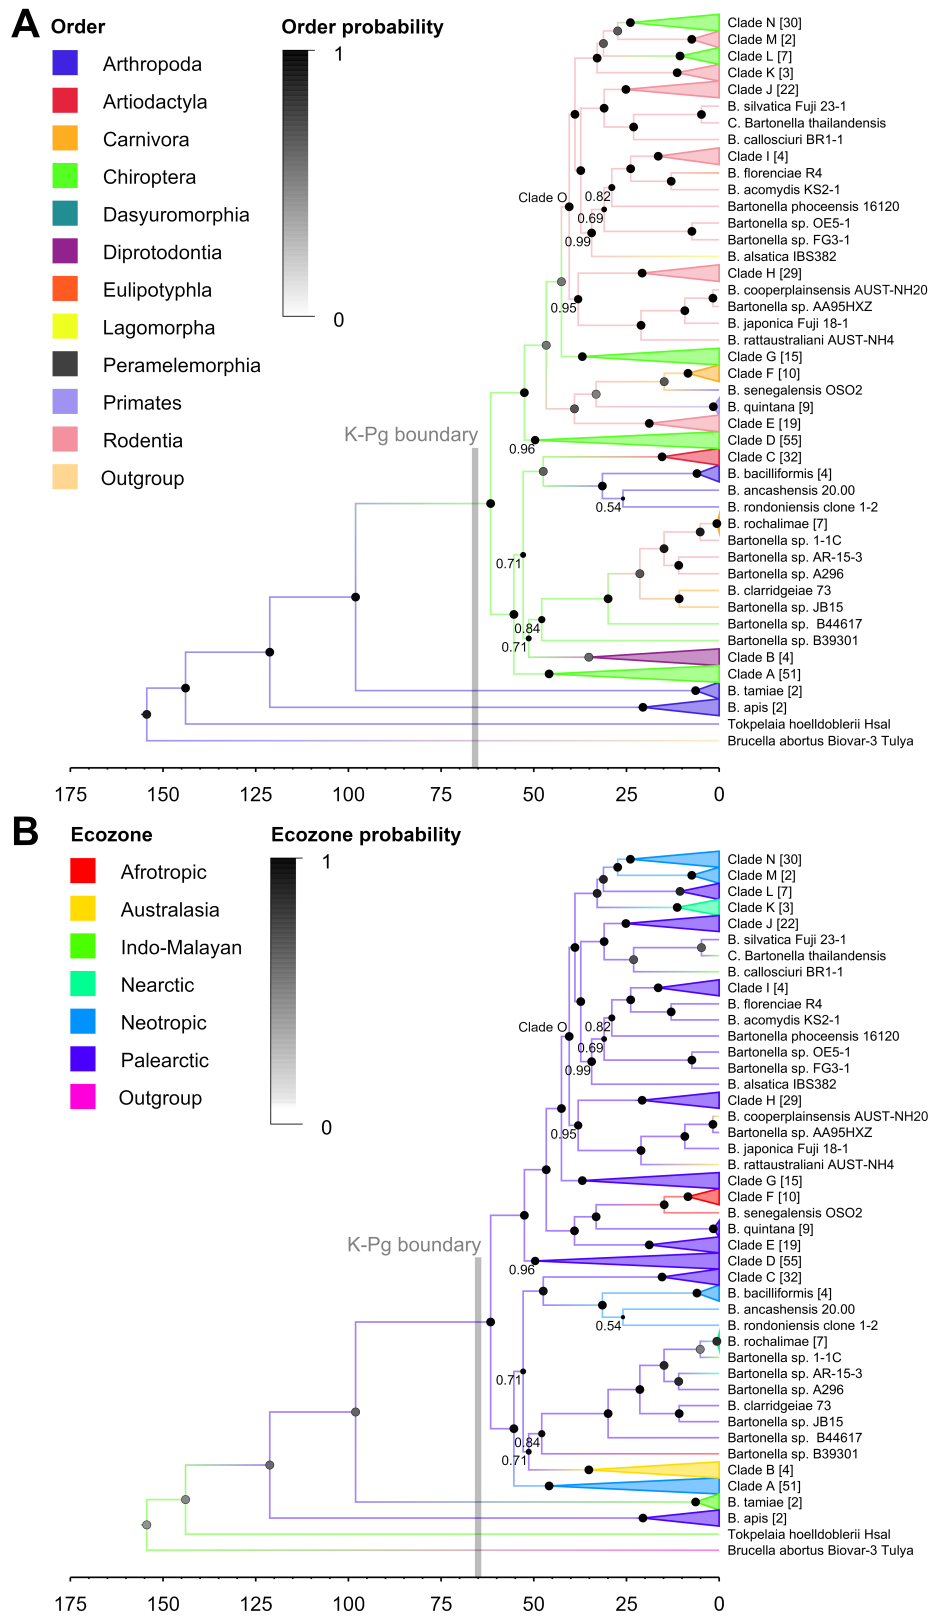

Fig. 2

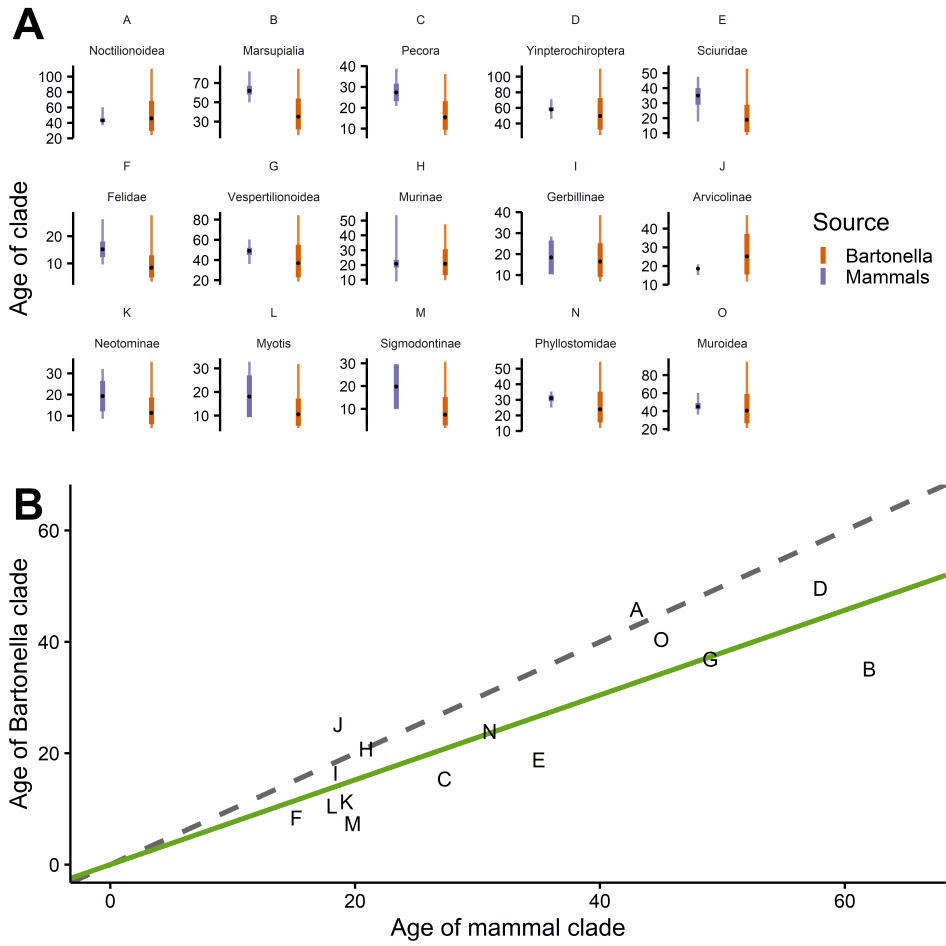

**Fig. 3**

**A**

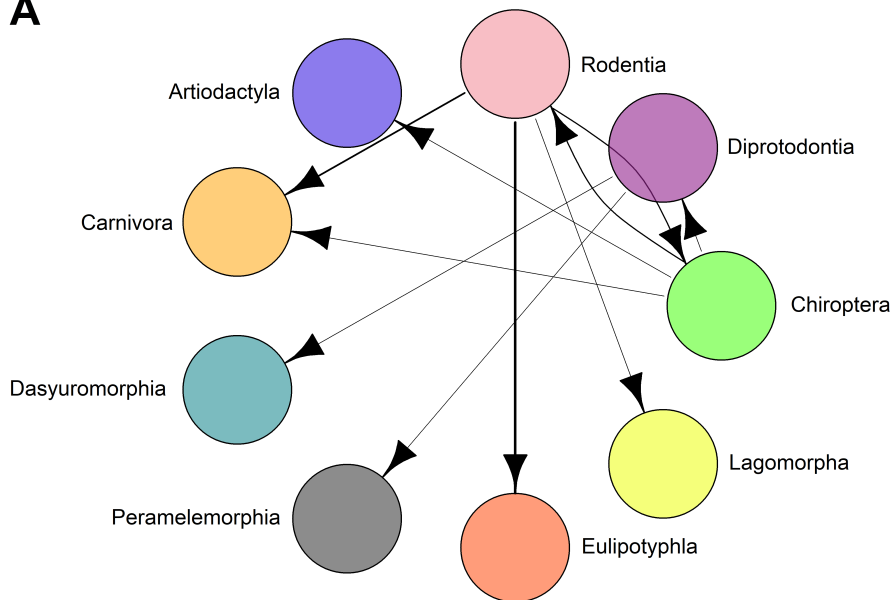

**B**

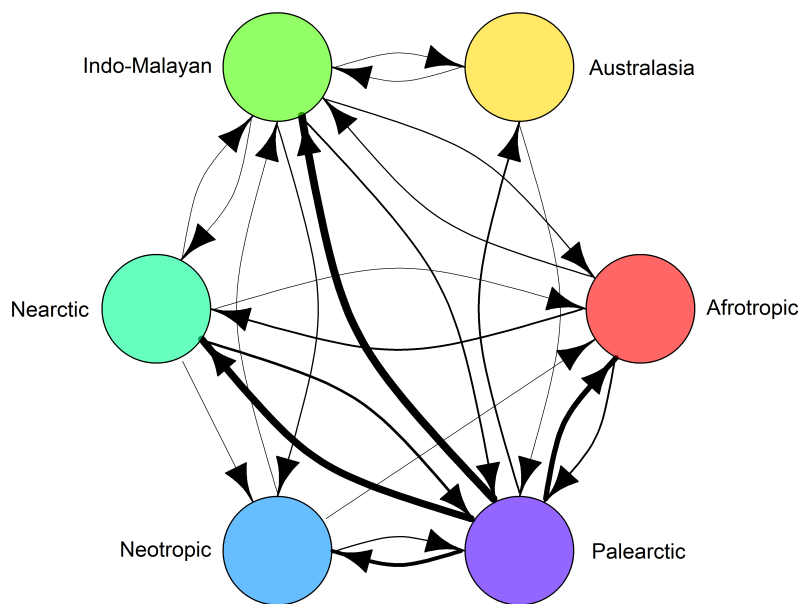

Source: http://biorxiv.org/content/10.1101/2020.04.03.024521v1.full.pdf
